# Supplementary material for: A longitudinal study on changes in weekend leisure time by age groups in Korea (1999–2019)
Source: Springer Nature journal article supplement (doi:10.1186/s12889-024-18101-z), 2024-02-22
Supplement: MOESM1 [file 26766116]

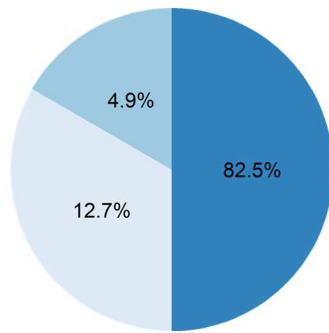

1999

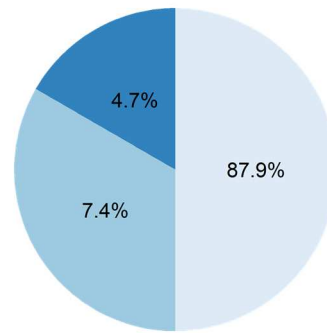

2004

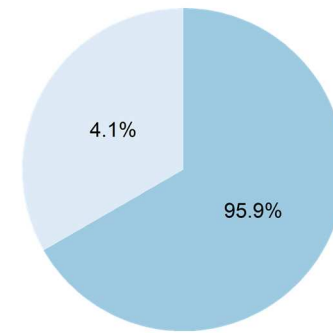

2009

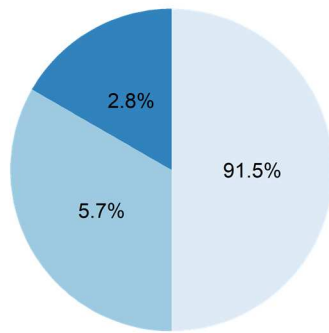

2014

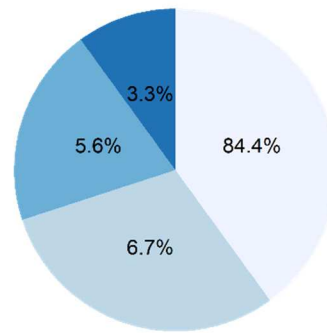

2019

S1 Fig. Proportion of potential cluster by survey periods.
